# Supplementary material
Source: MDPI journal article supplement (https://www.mdpi.com/2073-4468/12/2/33)
Supplement: s1 [file s1]

# Supplemental Figure S1

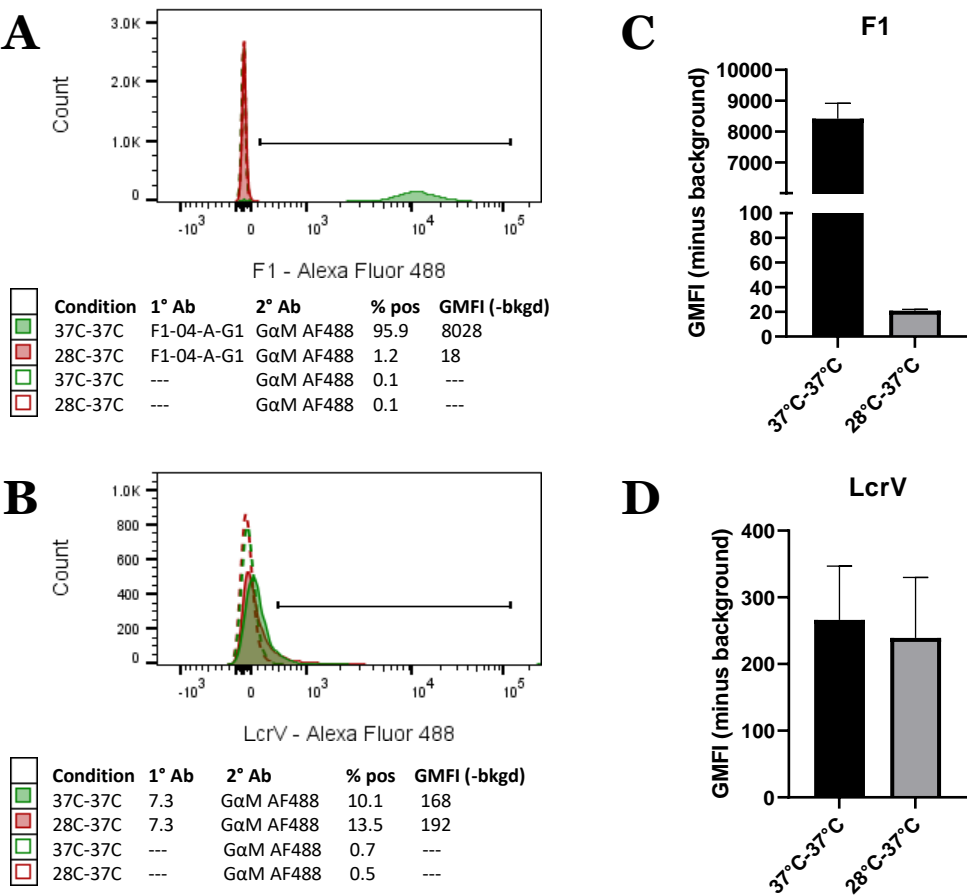

**Figure S1.** *Y. pestis* grown overnight at 37 °C has a robust F1 capsule, which is not seen in *Y. pestis* grown for only two hours at 37 °C. *Y. pestis* CO92 *pgm*- pPst- (37 °C-37 °C or 28 °C-37 °C) were incubated for 1 h with 10 µg/mL of anti-F1 antibody F1-04-A-G1 or anti-LcrV antibody 7.3, followed by 30 min incubation with goat anti-mouse secondary (Alexa Fluor 488 conjugate). **(A-B)** Bacterial populations were defined based on size and granularity, then quantified for AF488 fluorescence (x-axis). Shown here are representative data for F1 **(A)** and LcrV **(B)** surface staining, comparing F1 and LcrV fluorescence to the background fluorescence of secondary antibody alone. **(C-D)** Staining was quantified as geometric mean fluorescent intensity (GMFI), for four cultures of each growth condition across three independent experiments. After subtracting background, fluorescent intensity measurements were averaged together and plotted for F1 **(C)** and LcrV **(D)**. Bars show the average and SEM of fluorescent intensity for all cultures measured ( $n=4$ ).

Supplemental Table S1: Statistical Analyses for Figures 3 and 4

| <i>Y. pestis</i><br>growth<br>temp. | Expt.<br>Replicate | mAb Conc.<br>(μg) | Yp only                                | mAb 7.3                                                   | mAb F1-04-A-G1                                            | SAB Neg. Ctrl.                                         | SAB-183                                                   |
|-------------------------------------|--------------------|-------------------|----------------------------------------|-----------------------------------------------------------|-----------------------------------------------------------|--------------------------------------------------------|-----------------------------------------------------------|
| 28 °C-37 °C                         | A                  | 10                | Wilcoxon p values vs. Yp only          | <.0001                                                    | <.0001                                                    | 0.0192                                                 | <.0001                                                    |
|                                     |                    | 100               | Wilcoxon p values vs. Yp only          | <.0001                                                    | <.0001                                                    | 0.0001                                                 | <.0001                                                    |
|                                     |                    | 0                 | n<br>Median (Q1, Q3)<br>GEO Mean (GSE) | 6<br>24,000 ( 24,000 , 26,000 )<br>24,488.36 ( 1.06 )     |                                                           |                                                        |                                                           |
|                                     |                    | 10                | n<br>Median (Q1, Q3)<br>GEO Mean (GSE) | 6<br>150,000 ( 60,000 , 160,000 )<br>109,463.22 ( 1.30 )  | 6<br>66,000 ( 40,000 , 200,000 )<br>88,462.18 ( 1.48 )    | 6<br>25,000 ( 24,000 , 30,000 )<br>26,200.42 ( 1.09 )  | 6<br>69,000 ( 54,000 , 100,000 )<br>66,968.26 ( 1.18 )    |
|                                     |                    | 100               | n<br>Median (Q1, Q3)<br>GEO Mean (GSE) | 6<br>120,000 ( 80,000 , 180,000 )<br>121,041.93 ( 1.25 )  | 6<br>78,000 ( 52,000 , 1,000,000 )<br>162,996.97 ( 1.89 ) | 6<br>90,000 ( 40,000 , 120,000 )<br>70,509.38 ( 1.37 ) | 6<br>140,000 ( 80,000 , 160,000 )<br>123,446.55 ( 1.16 )  |
|                                     |                    | 0                 | n<br>Median (Q1, Q3)<br>GEO Mean (GSE) | 6<br>27,000 ( 24,000 , 30,000 )<br>25,350.65 ( 1.11 )     |                                                           |                                                        |                                                           |
|                                     | B                  | 10                | n<br>Median (Q1, Q3)<br>GEO Mean (GSE) | 6<br>150,000 ( 140,000 , 200,000 )<br>154,871.48 ( 1.12 ) | 6<br>49,000 ( 48,000 , 58,000 )<br>50,216.75 ( 1.06 )     | 6<br>60,000 ( 40,000 , 80,000 )<br>58,711.97 ( 1.19 )  | 6<br>170,000 ( 120,000 , 200,000 )<br>157,399.88 ( 1.13 ) |
|                                     |                    | 100               | n<br>Median (Q1, Q3)<br>GEO Mean (GSE) | 6<br>310,000 ( 280,000 , 340,000 )<br>289,188.73 ( 1.14 ) | 6<br>90,000 ( 60,000 , 140,000 )<br>95,711.89 ( 1.29 )    | 6<br>80,000 ( 60,000 , 140,000 )<br>88,603.38 ( 1.20 ) | 6<br>280,000 ( 200,000 , 300,000 )<br>251,657.67 ( 1.10 ) |
|                                     |                    | 0                 | n<br>Median (Q1, Q3)<br>GEO Mean (GSE) | 6<br>4,000 ( 4,000 , 8,000 )<br>4,659.97 ( 1.27 )         |                                                           |                                                        |                                                           |
| 37 °C-37 °C                         | A                  | 10                | Wilcoxon p values vs. Yp only          | 0.0002                                                    | <.0001                                                    | 0.4845                                                 | 0.001                                                     |
|                                     |                    | 100               | Wilcoxon p values vs. Yp only          | <.0001                                                    | <.0001                                                    | 0.7011                                                 | <.0001                                                    |
|                                     |                    | 0                 | n<br>Median (Q1, Q3)<br>GEO Mean (GSE) | 6<br>8,000 ( 6,000 , 10,000 )<br>7,239.81 ( 1.17 )        | 6<br>62,000 ( 36,000 , 100,000 )<br>59,092.28 ( 1.27 )    | 6<br>5,600 ( 4,000 , 6,000 )<br>4,783.52 ( 1.22 )      | 6<br>18,000 ( 8,000 , 20,000 )<br>14,138.36 ( 1.27 )      |
|                                     |                    | 10                | n<br>Median (Q1, Q3)<br>GEO Mean (GSE) | 6<br>13,000 ( 10,000 , 18,000 )<br>12,778.82 ( 1.14 )     | 6<br>20,000 ( 18,000 , 28,000 )<br>22,441.45 ( 1.15 )     | 6<br>4,300 ( 3,400 , 5,200 )<br>4,285.17 ( 1.11 )      | 6<br>26,000 ( 20,000 , 26,000 )<br>23,973.09 ( 1.08 )     |
|                                     |                    | 100               | n<br>Median (Q1, Q3)<br>GEO Mean (GSE) | 6<br>24,000 ( 22,000 , 24,000 )<br>23,254.66 ( 1.04 )     | 6<br>35,000 ( 32,000 , 56,000 )<br>41,107.75 ( 1.24 )     | 6<br>1,300 ( 1,000 , 1,600 )<br>1,275.24 ( 1.09 )      | 6<br>44,000 ( 40,000 , 48,000 )<br>43,693.69 ( 1.05 )     |
|                                     |                    | 0                 | n<br>Median (Q1, Q3)<br>GEO Mean (GSE) | 6<br>900 ( 800 , 1,000 )<br>323.77 ( 3.20 )               |                                                           |                                                        |                                                           |
|                                     | B                  | 10                | n<br>Median (Q1, Q3)<br>GEO Mean (GSE) | 6<br>11,000 ( 8,000 , 16,000 )<br>10,880.17 ( 1.19 )      | 6<br>43,000 ( 42,000 , 50,000 )<br>43,721.89 ( 1.05 )     | 6<br>1,600 ( 1,400 , 2,000 )<br>1,431.41 ( 1.20 )      | 6<br>6,200 ( 4,800 , 6,800 )<br>5,748.82 ( 1.12 )         |
|                                     |                    | 100               | n<br>Median (Q1, Q3)<br>GEO Mean (GSE) | 6<br>24,000 ( 22,000 , 24,000 )<br>23,254.66 ( 1.04 )     | 6<br>35,000 ( 32,000 , 56,000 )<br>41,107.75 ( 1.24 )     | 6<br>1,300 ( 1,000 , 1,600 )<br>1,275.24 ( 1.09 )      | 6<br>44,000 ( 40,000 , 48,000 )<br>43,693.69 ( 1.05 )     |
|                                     |                    | 0                 | n<br>Median (Q1, Q3)<br>GEO Mean (GSE) | 6<br>900 ( 800 , 1,000 )<br>323.77 ( 3.20 )               |                                                           |                                                        |                                                           |
